# Supplementary material for: Combination of paclitaxel, bevacizumab and MEK162 in second line treatment in platinum-relapsing patient derived ovarian cancer xenografts
Source: Springer Nature journal article supplement (doi:10.1186/s12943-017-0662-3), 2017-05-30

Supplementary figure 2

A)

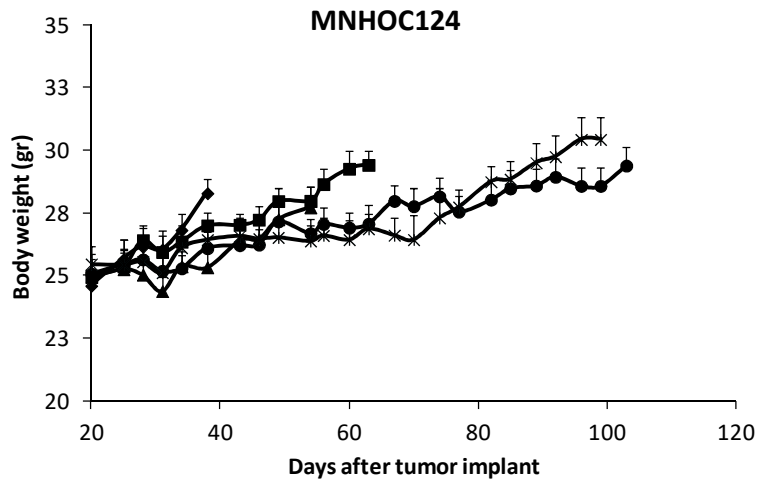

B)

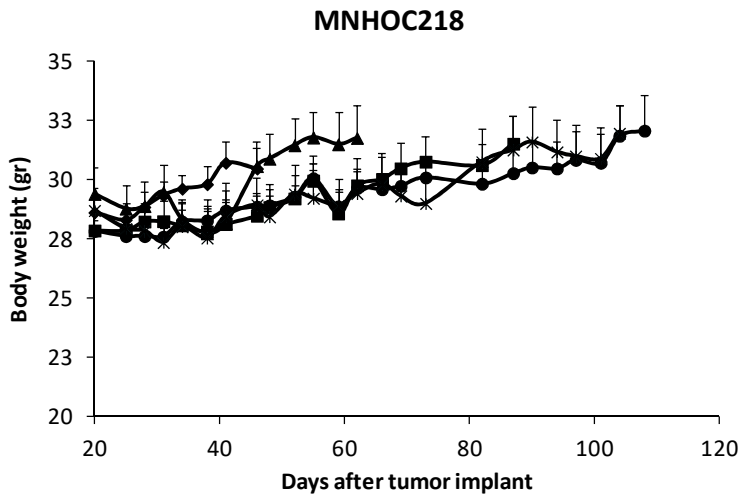

C)

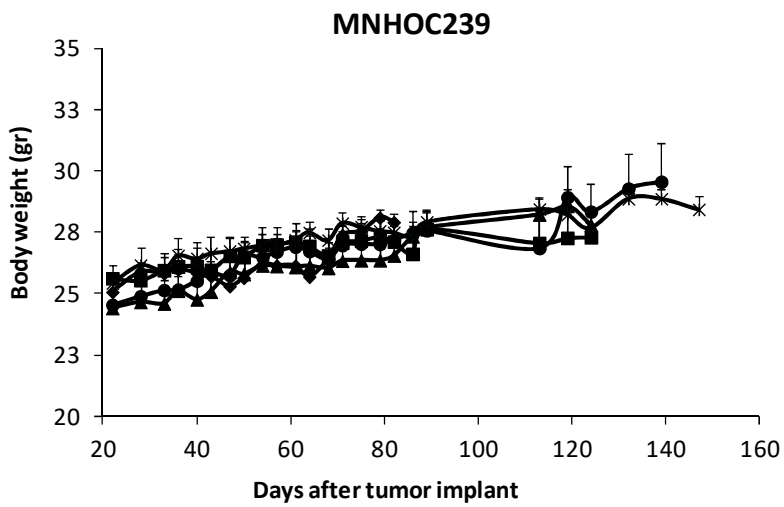

Supplement: MOESM2 [file 12326532]
